# Supplementary material for: Constraints on Ore Genesis from Trace Ore Mineralogy: A New Occurrence of Kupčíkite and Paděraite from the Zhibula Cu Skarn Deposit, Southern Tibet
Source: MDPI journal article supplement (doi:10.3390/min14050474), 2024-04-29
Supplement: s1 [file s1]

## Supplementary Material A. EPMA and LA-ICP-MS methodology

### *Electron probe microanalysis (EPMA)*

A Cameca SX-Five Electron Probe Microanalyser (EPMA) was operated at an accelerating voltage of 20 kV, a beam current of 20 nA and an estimated beam diameter of ~1  $\mu\text{m}$ .

X-ray lines and standards used were as follows: S K $\alpha$  (greenockite), Pb M $\alpha$  (galena), Cd L $\alpha$  (greenockite), As L $\alpha$  (gallium arsenide), Se L $\alpha$  (bismuth selenide), Fe K $\alpha$ , Cu K $\alpha$  (chalcopyrite), Mn K $\alpha$  (rhodonite), Ag L $\alpha$  (silver telluride), Sn L $\alpha$  (cassiterite), In L $\alpha$  (indium), Hg L $\alpha$  (cinnabar), Zn K $\alpha$  (sphalerite), Ni K $\alpha$  (pentlandite), Co K $\alpha$  (cobalt), Sb L $\alpha$  (stibnite), Te L $\alpha$  (silver telluride), Bi M $\alpha$  (bismuth selenide), Tl M $\alpha$  (thallium), and Au L $\alpha$  (gold). Count times were 10 seconds (s) for unknown and 10 s background for all elements. The average minimum detection limits, in wt.%, were: S (0.014), Pb (0.035), Cd (0.032), As (0.05), Se (0.034), Fe (0.02), Cu (0.038), Mn (0.019), Ag (0.06), Sn (0.029), In (0.018), Hg (0.079), Zn (0.029), Ni (0.024), Co (0.17), Sb (0.029), Te (0.015), Bi (0.029), Tl (0.048), and Au (0.14).

### *Laser-ablation inductively coupled – plasma mass spectrometry (LA-ICP-MS)*

LA-ICP-MS analysis was performed on a Resonetics M-50-LR 193 nm Excimer laser attached to an Agilent 7700cx Quadrupole ICP mass spectrometer. This new-generation laser system offers excellent spatial resolution coupled with sub-ppm level sensitivity. The M-50 utilizes a two-volume ablation cell designed by Laurin Technic Pty. Ablation was performed in an atmosphere of UHP He (0.71/min), and upon exiting the cell the aerosol is mixed with Ar (0.93 l/min) immediately after the ablation cell, after which the mix is passed through a pulse-homogenizing device prior to direction into the torch. The ICP-MS system was optimized daily to maximize sensitivity on isotopes of the mass range of interest, while keeping production of molecular oxide species and doubly-charged ion species as low as possible (usually <0.2%).

LA-ICP-MS spot analysis was carried out with the laser beam energy output set at 80 mJ at a 30  $\mu\text{m}$  spot size. A laser repetition rate of 10 Hz was used in the polished blocks and of 5 Hz in thin section. The following basic set of isotopes were monitored:  $^{34}\text{S}$ ,  $^{51}\text{V}$ ,  $^{52}\text{Cr}$ ,  $^{55}\text{Mn}$ ,  $^{57}\text{Fe}$ ,  $^{59}\text{Co}$ ,  $^{60}\text{Ni}$ ,  $^{65}\text{Cu}$ ,  $^{66}\text{Zn}$ ,  $^{69}\text{Ga}$ ,  $^{75}\text{As}$ ,  $^{77}\text{Se}$ ,  $^{95}\text{Mo}$ ,  $^{107}\text{Ag}$ ,  $^{111}\text{Cd}$ ,  $^{115}\text{In}$ ,  $^{118}\text{Sn}$ ,  $^{121}\text{Sb}$ ,  $^{125}\text{Te}$ ,  $^{137}\text{Ba}$ ,  $^{182}\text{W}$ ,  $^{193}\text{Ir}$ ,  $^{197}\text{Au}$ ,  $^{202}\text{Hg}$ ,  $^{204}\text{Pb}$ ,  $^{205}\text{Tl}$ ,  $^{208}\text{Pb}$ , and  $^{209}\text{Bi}$ . Analysis time for each spot analysis was a uniform 80 s, comprising a 30-s measurement of background (laser-off), and 50-s analysis of the unknown (laser-on). Standard reference material was Mass-1 using coefficients given by [Wilson et al. \(2002\)](#). Standards were run after each batch of 22-26 unknowns; detection limits were calculated for each element in each spot analysis. Internal calibration was achieved using concentration values of Cu, obtained from electron probe microanalysis.

Data reduction was performed using GLITTER software ([Van Achterbergh et al., 2001](#)). The analytical uncertainty output in GLITTER is a combination of internal (counting statistics, noise of the measurements over the length of analysis) and external signal uncertainties (mass bias, correction of unknowns to standards, laser-induced elemental fractionation (LIEF), instrument drift). Assuming a stabilized cell, the largest contribution to analytical uncertainty will be LIEF, followed by counting statistics, followed by instrument drift. To minimize LIEF, the spot size, frequency, and fluence are identical from standards to unknowns. Additionally, dwell times are kept as long as reasonably possible and the method is run for as long as reasonably possible, to get better count statistics.

### References

Wilson, S., Ridley, W., Koenig, A., 2002. Development of sulphide calibration standards for the laser ablation inductively-coupled plasma mass spectrometry technique. *J. Anal. At. Spectrom.* 17, 406–409.

Van Achterbergh, E., Ryan, C.G., Jackson, S.E., Griffin, W.L., 2001. Data reduction software for LAICP-MS. In: Sylvester, J.P. (Ed.), *Laser-ablation-ICPMS in the Earth Sciences; Principles and Applications*. Mineralogical Association of Canada, Short Course Series 29, 239-243.

**Table S1.** EPMA data for bornite, chalcopyrite and chalcocite of the Zhibula Cu skarn.

|                  | Cu                                                  | Ag          | Fe           | Pb          | Bi          | S            | Se          | Co          | Total         | Cu                    | Ag           | Pb           | Fe           | Bi           | Total M      | S            | Se           | S(+Se)       | M/S          |
|------------------|-----------------------------------------------------|-------------|--------------|-------------|-------------|--------------|-------------|-------------|---------------|-----------------------|--------------|--------------|--------------|--------------|--------------|--------------|--------------|--------------|--------------|
|                  | Normal bornite ( $\text{Cu}_5\text{FeS}_4$ ) (wt.%) |             |              |             |             |              |             |             |               | Formula (to 10 atoms) |              |              |              |              |              |              |              |              |              |
| 8Bn-1            | 63.36                                               | 0.13        | 11.29        | 0.10        | 0.24        | 26.24        | <dl         | <dl         | 101.37        | 4.934                 | 0.006        | 0.002        | 1.000        | 0.006        | 5.949        | 4.051        | -            | 4.051        | 1.468        |
| 8Bn-2            | 63.68                                               | 0.20        | 11.22        | 0.05        | 0.14        | 26.11        | 0.04        | 0.02        | 101.45        | 4.959                 | 0.009        | 0.001        | 0.995        | 0.003        | 5.968        | 4.030        | 0.002        | 4.032        | 1.480        |
| 8Bn-3            | 63.55                                               | 0.12        | 11.24        | <dl         | 0.19        | 26.12        | <dl         | <dl         | 101.22        | 4.955                 | 0.005        | -            | 0.998        | 0.004        | 5.963        | 4.037        | -            | 4.037        | 1.477        |
| 8Bn-4            | 63.40                                               | 0.15        | 11.22        | 0.05        | 0.20        | 26.30        | 0.05        | 0.02        | 101.37        | 4.934                 | 0.007        | 0.001        | 0.994        | 0.005        | 5.940        | 4.057        | 0.003        | 4.060        | 1.463        |
| 8Bn-5            | 63.19                                               | 0.10        | 11.23        | 0.05        | 0.22        | 26.16        | 0.09        | <dl         | 101.03        | 4.935                 | 0.005        | 0.001        | 0.998        | 0.005        | 5.945        | 4.050        | 0.006        | 4.055        | 1.466        |
| 8Bn-6            | 63.22                                               | 0.11        | 11.32        | <dl         | 0.25        | 26.27        | <dl         | <dl         | 101.17        | 4.927                 | 0.005        | -            | 1.004        | 0.006        | 5.942        | 4.058        | -            | 4.058        | 1.464        |
| 8Bn-7            | 63.69                                               | 0.14        | 11.21        | 0.06        | 0.20        | 26.23        | 0.08        | 0.03        | 101.59        | 4.950                 | 0.006        | 0.001        | 0.991        | 0.005        | 5.954        | 4.041        | 0.005        | 4.046        | 1.471        |
| 8Bn-8            | 63.47                                               | 0.10        | 11.26        | <dl         | 0.15        | 25.77        | 0.04        | <dl         | 100.79        | 4.978                 | 0.005        | -            | 1.005        | 0.004        | 5.991        | 4.006        | 0.003        | 4.009        | 1.495        |
| 8Bn-9            | 63.76                                               | 0.15        | 11.32        | <dl         | 0.14        | 25.99        | <dl         | <dl         | 101.35        | 4.970                 | 0.007        | -            | 1.004        | 0.003        | 5.984        | 4.016        | -            | 4.016        | 1.490        |
| 8Bn-10           | 63.76                                               | <dl         | 11.21        | <dl         | 0.18        | 26.35        | 0.09        | 0.02        | 101.59        | 4.948                 | -            | -            | 0.990        | 0.004        | 5.942        | 4.053        | 0.005        | 4.058        | 1.464        |
| 8Bn-11           | 63.06                                               | 0.08        | 11.16        | 0.07        | 0.19        | 26.18        | <dl         | <dl         | 100.75        | 4.935                 | 0.004        | 0.002        | 0.994        | 0.005        | 5.939        | 4.061        | -            | 4.061        | 1.463        |
| 8Bn-12           | 63.57                                               | <dl         | 11.15        | <dl         | 0.14        | 26.05        | 0.05        | <dl         | 100.96        | 4.967                 | -            | -            | 0.991        | 0.003        | 5.962        | 4.035        | 0.003        | 4.038        | 1.476        |
| 8Bn-13           | 62.57                                               | 0.10        | 10.87        | <dl         | 0.20        | 26.13        | 0.05        | <dl         | 99.91         | 4.931                 | 0.005        | -            | 0.975        | 0.005        | 5.915        | 4.082        | 0.003        | 4.085        | 1.448        |
| 8Bn-14           | 63.26                                               | 0.06        | 11.26        | 0.04        | 0.19        | 26.17        | 0.07        | 0.02        | 101.06        | 4.938                 | 0.003        | 0.001        | 1.000        | 0.005        | 5.946        | 4.049        | 0.004        | 4.054        | 1.467        |
| 8Bn-15           | 62.80                                               | 0.10        | 10.88        | 0.05        | 0.13        | 27.74        | <dl         | 0.03        | 101.71        | 4.820                 | 0.005        | 0.001        | 0.950        | 0.003        | 5.779        | 4.221        | -            | 4.221        | 1.369        |
| 8Bn-16           | 62.96                                               | 0.14        | 11.07        | <dl         | 0.11        | 26.09        | <dl         | <dl         | 100.37        | 4.942                 | 0.006        | -            | 0.989        | 0.003        | 5.940        | 4.060        | -            | 4.060        | 1.463        |
| 8Bn-17           | 62.50                                               | 0.10        | 10.87        | <dl         | 0.19        | 26.25        | 0.04        | <dl         | 99.95         | 4.920                 | 0.005        | -            | 0.973        | 0.005        | 5.902        | 4.095        | 0.003        | 4.098        | 1.440        |
| 8Bn-18           | 62.52                                               | 0.23        | 10.78        | <dl         | 0.15        | 26.33        | 0.04        | 0.02        | 100.05        | 4.916                 | 0.011        | -            | 0.965        | 0.003        | 5.894        | 4.103        | 0.002        | 4.106        | 1.436        |
| 8Bn-19           | 63.47                                               | 0.11        | 10.91        | <dl         | 0.12        | 26.01        | <dl         | 0.02        | 100.61        | 4.977                 | 0.005        | -            | 0.973        | 0.003        | 5.958        | 4.042        | -            | 4.042        | 1.474        |
| 8Bn-20           | 63.41                                               | 0.14        | 11.48        | 0.08        | 0.21        | 26.64        | 0.07        | <dl         | 102.04        | 4.896                 | 0.006        | 0.002        | 1.009        | 0.005        | 5.918        | 4.078        | 0.005        | 4.082        | 1.450        |
| 8Bn-21           | 63.47                                               | 0.13        | 11.29        | 0.07        | 0.31        | 26.66        | 0.04        | <dl         | 101.98        | 4.905                 | 0.006        | 0.002        | 0.993        | 0.007        | 5.914        | 4.084        | 0.003        | 4.086        | 1.447        |
| 8Bn-22           | 63.52                                               | 0.13        | 11.31        | 0.10        | 0.14        | 26.69        | <dl         | <dl         | 101.89        | 4.907                 | 0.006        | 0.002        | 0.994        | 0.003        | 5.913        | 4.087        | -            | 4.087        | 1.447        |
| 8Bn-23           | 63.31                                               | 0.22        | 11.32        | 0.06        | 0.21        | 26.56        | <dl         | 0.02        | 101.69        | 4.906                 | 0.010        | 0.001        | 0.998        | 0.005        | 5.920        | 4.080        | -            | 4.080        | 1.451        |
| 8Bn-24           | 63.53                                               | 0.14        | 11.33        | 0.11        | 0.20        | 26.71        | <dl         | <dl         | 102.03        | 4.904                 | 0.006        | 0.003        | 0.995        | 0.005        | 5.913        | 4.087        | -            | 4.087        | 1.447        |
| 8Bn-25           | 63.42                                               | 0.11        | 11.21        | 0.07        | 0.22        | 26.41        | <dl         | 0.02        | 101.44        | 4.929                 | 0.005        | 0.002        | 0.991        | 0.005        | 5.932        | 4.068        | -            | 4.068        | 1.458        |
| 8Bn-26           | 63.49                                               | 0.09        | 11.25        | 0.25        | 0.18        | 26.51        | 0.09        | 0.02        | 101.88        | 4.917                 | 0.004        | 0.006        | 0.992        | 0.004        | 5.924        | 4.071        | 0.006        | 4.076        | 1.453        |
| 8Bn-27           | 63.45                                               | 0.14        | 11.27        | <dl         | 0.16        | 26.70        | 0.04        | 0.04        | 101.75        | 4.905                 | 0.007        | -            | 0.991        | 0.004        | 5.907        | 4.091        | 0.002        | 4.093        | 1.443        |
| 8Bn-28           | 63.85                                               | 0.09        | 11.31        | 0.06        | 0.18        | 26.48        | 0.06        | 0.02        | 102.08        | 4.935                 | 0.004        | 0.001        | 0.995        | 0.004        | 5.940        | 4.057        | 0.004        | 4.060        | 1.463        |
| 8Bn-29           | 63.90                                               | 0.13        | 11.26        | 0.07        | 0.15        | 26.23        | <dl         | 0.03        | 101.76        | 4.959                 | 0.006        | 0.002        | 0.994        | 0.004        | 5.965        | 4.035        | -            | 4.035        | 1.478        |
| <b>Mean (29)</b> | <b>63.35</b>                                        | <b>0.13</b> | <b>11.19</b> | <b>0.08</b> | <b>0.18</b> | <b>26.35</b> | <b>0.06</b> | <b>0.02</b> | <b>101.27</b> | <b>4.931</b>          | <b>0.005</b> | <b>0.001</b> | <b>0.991</b> | <b>0.004</b> | <b>5.933</b> | <b>4.065</b> | <b>0.002</b> | <b>4.067</b> | <b>1.459</b> |
| 180Bn-1          | 60.69                                               | <dl         | 14.76        | <dl         | 0.25        | 26.76        | 0.05        | 0.16        | 102.52        | 4.645                 | -            | -            | 1.286        | 0.006        | 5.937        | 4.060        | 0.003        | 4.063        | 1.461        |
| 180Bn-2          | 60.59                                               | 0.06        | 14.87        | <dl         | 0.26        | 26.83        | <dl         | 0.17        | 102.61        | 4.632                 | 0.003        | -            | 1.294        | 0.006        | 5.934        | 4.066        | -            | 4.066        | 1.460        |
| 180Bn-3          | 60.86                                               | <dl         | 15.23        | <dl         | 0.30        | 26.22        | <dl         | 0.08        | 102.61        | 4.672                 | -            | -            | 1.331        | 0.007        | 6.010        | 3.990        | -            | 3.990        | 1.506        |

|                  |              |             |              |             |             |              |             |             |               |              |              |              |              |              |              |              |              |              |              |
|------------------|--------------|-------------|--------------|-------------|-------------|--------------|-------------|-------------|---------------|--------------|--------------|--------------|--------------|--------------|--------------|--------------|--------------|--------------|--------------|
| <b>Mean (3)</b>  | <b>60.71</b> | <b>0.06</b> | <b>14.96</b> | <dl         | <b>0.27</b> | <b>26.60</b> | <b>0.05</b> | <b>0.14</b> | <b>102.58</b> | <b>4.650</b> | <b>0.001</b> | -            | <b>1.303</b> | <b>0.006</b> | <b>5.960</b> | <b>4.039</b> | <b>0.001</b> | <b>4.040</b> | <b>1.476</b> |
| 372Bn-1          | 62.93        | 0.10        | 11.65        | 0.09        | 0.25        | 26.23        | 0.06        | 0.02        | 101.34        | 4.901        | 0.005        | 0.002        | 1.032        | 0.006        | 5.946        | 4.050        | 0.004        | 4.054        | 1.467        |
| 372Bn-2          | 62.52        | 0.09        | 11.64        | <dl         | 0.39        | 26.13        | <dl         | <dl         | 100.77        | 4.894        | 0.004        | -            | 1.037        | 0.009        | 5.945        | 4.055        | -            | 4.055        | 1.466        |
| <b>Mean (2)</b>  | <b>62.72</b> | <b>0.10</b> | <b>11.64</b> | <b>0.09</b> | <b>0.32</b> | <b>26.18</b> | <b>0.06</b> | <b>0.02</b> | <b>101.06</b> | <b>4.898</b> | <b>0.004</b> | <b>0.001</b> | <b>1.035</b> | <b>0.008</b> | <b>5.945</b> | <b>4.053</b> | <b>0.002</b> | <b>4.055</b> | <b>1.466</b> |
| 374Bn-1          | 63.57        | <dl         | 11.44        | 0.06        | 0.22        | 23.38        | <dl         | 0.02        | 98.67         | 5.167        | -            | 0.001        | 1.058        | 0.005        | 6.232        | 3.768        | -            | 3.768        | 1.654        |
| 374Bn-2          | 63.79        | <dl         | 11.30        | 0.05        | 0.17        | 24.90        | <dl         | 0.02        | 100.26        | 5.060        | -            | 0.001        | 1.020        | 0.004        | 6.085        | 3.915        | -            | 3.915        | 1.554        |
| 374Bn-3          | 63.71        | <dl         | 11.41        | <dl         | 0.14        | 24.98        | <dl         | 0.03        | 100.24        | 5.046        | -            | -            | 1.028        | 0.003        | 6.078        | 3.922        | -            | 3.922        | 1.549        |
| 374Bn-4          | 63.66        | <dl         | 11.41        | <dl         | 0.20        | 24.90        | 0.05        | <dl         | 100.21        | 5.049        | -            | -            | 1.029        | 0.005        | 6.083        | 3.914        | 0.003        | 3.917        | 1.553        |
| 374Bn-5          | 63.47        | 0.06        | 11.31        | <dl         | 0.20        | 25.20        | 0.07        | 0.02        | 100.37        | 5.020        | 0.003        | -            | 1.018        | 0.005        | 6.046        | 3.950        | 0.004        | 3.954        | 1.529        |
| 374Bn-6          | 63.53        | <dl         | 11.33        | <dl         | 0.12        | 25.23        | 0.06        | <dl         | 100.27        | 5.022        | -            | -            | 1.019        | 0.003        | 6.044        | 3.952        | 0.004        | 3.956        | 1.528        |
| 374Bn-7          | 63.87        | <dl         | 11.37        | 0.07        | 0.14        | 25.21        | 0.08        | <dl         | 100.75        | 5.032        | -            | 0.002        | 1.020        | 0.003        | 6.057        | 3.938        | 0.005        | 3.943        | 1.536        |
| 374Bn-8          | 64.50        | <dl         | 10.27        | 0.03        | 0.19        | 25.18        | 0.07        | <dl         | 100.23        | 5.110        | -            | 0.001        | 0.926        | 0.004        | 6.041        | 3.955        | 0.004        | 3.959        | 1.526        |
| 374Bn-9          | 64.01        | <dl         | 11.49        | <dl         | 0.14        | 25.39        | 0.07        | 0.02        | 101.14        | 5.020        | -            | -            | 1.026        | 0.003        | 6.049        | 3.947        | 0.004        | 3.951        | 1.531        |
| 374Bn-10         | 64.13        | <dl         | 11.40        | <dl         | 0.15        | 25.16        | <dl         | 0.02        | 100.90        | 5.048        | -            | -            | 1.022        | 0.004        | 6.074        | 3.926        | -            | 3.926        | 1.547        |
| 374Bn-11         | 62.79        | 0.19        | 11.59        | 0.08        | 0.51        | 25.64        | 0.07        | <dl         | 100.90        | 4.938        | 0.009        | 0.002        | 1.037        | 0.012        | 5.998        | 3.997        | 0.005        | 4.002        | 1.499        |
| 374Bn-12         | 63.76        | <dl         | 11.28        | 0.10        | 0.16        | 25.05        | <dl         | 0.02        | 100.34        | 5.047        | -            | 0.002        | 1.016        | 0.004        | 6.070        | 3.930        | -            | 3.930        | 1.544        |
| 374Bn-13         | 61.39        | 0.20        | 11.37        | 0.10        | 0.29        | 25.06        | 0.09        | <dl         | 98.59         | 4.938        | 0.009        | 0.002        | 1.041        | 0.007        | 5.998        | 3.996        | 0.006        | 4.002        | 1.499        |
| <b>Mean (13)</b> | <b>63.55</b> | <b>0.11</b> | <b>11.31</b> | <b>0.07</b> | <b>0.20</b> | <b>25.02</b> | <b>0.06</b> | <b>0.02</b> | <b>100.22</b> | <b>5.038</b> | <b>0.002</b> | <b>0.001</b> | <b>1.020</b> | <b>0.005</b> | <b>6.065</b> | <b>3.932</b> | <b>0.003</b> | <b>3.935</b> | <b>1.542</b> |

| Chalcopyrite (CuFeS <sub>2</sub> ) (wt.%) |              |             |              |             |             |              |             |             |               | Formula (to 4 atoms) |              |              |              |              |              |              |              |              |              |
|-------------------------------------------|--------------|-------------|--------------|-------------|-------------|--------------|-------------|-------------|---------------|----------------------|--------------|--------------|--------------|--------------|--------------|--------------|--------------|--------------|--------------|
| 180Cp-1                                   | 34.91        | <dl         | 30.52        | 0.07        | 0.14        | 35.54        | 0.06        | 0.04        | 101.28        | 0.996                | -            | 0.000        | 0.991        | 0.001        | 1.988        | 2.010        | 0.001        | 2.011        | 0.989        |
| 180Cp-2                                   | 34.24        | <dl         | 31.98        | <dl         | 0.14        | 35.24        | 0.03        | 0.06        | 101.62        | 0.975                | -            | -            | 1.036        | 0.001        | 2.011        | 1.988        | 0.001        | 1.989        | 1.011        |
| 180Cp-3                                   | 34.67        | <dl         | 30.56        | <dl         | 0.11        | 35.79        | 0.06        | 0.05        | 101.19        | 0.987                | -            | -            | 0.990        | 0.001        | 1.979        | 2.020        | 0.001        | 2.021        | 0.979        |
| 180Cp-4                                   | 34.29        | <dl         | 30.08        | <dl         | 0.06        | 35.62        | 0.04        | 0.05        | 100.14        | 0.985                | -            | -            | 0.984        | 0.001        | 1.970        | 2.029        | 0.001        | 2.030        | 0.970        |
| 180Cp-5                                   | 34.57        | 0.06        | 29.89        | 0.08        | 0.16        | 35.57        | 0.04        | 0.05        | 100.37        | 0.993                | 0.001        | 0.000        | 0.977        | 0.001        | 1.973        | 2.026        | 0.001        | 2.027        | 0.973        |
| 180Cp-6                                   | 35.33        | <dl         | 30.92        | 0.06        | 0.30        | 32.71        | 0.06        | 0.10        | 99.37         | 1.043                | -            | 0.000        | 1.039        | 0.003        | 2.084        | 1.914        | 0.001        | 1.915        | 1.088        |
| <b>Mean (6)</b>                           | <b>34.67</b> | <b>0.01</b> | <b>30.66</b> | <b>0.03</b> | <b>0.15</b> | <b>35.08</b> | <b>0.05</b> | <b>0.06</b> | <b>100.66</b> | <b>0.997</b>         | <b>0.000</b> | <b>0.000</b> | <b>1.003</b> | <b>0.001</b> | <b>2.001</b> | <b>1.998</b> | <b>0.001</b> | <b>1.999</b> | <b>1.001</b> |
| 372Cp-1                                   | 35.22        | 0.07        | 30.40        | <dl         | 0.13        | 35.36        | <dl         | 0.05        | 101.21        | 1.006                | 0.001        | -            | 0.989        | 0.001        | 1.997        | 2.003        | -            | 2.003        | 0.997        |
| 372Cp-2                                   | 34.34        | <dl         | 29.98        | 0.10        | 0.13        | 35.40        | 0.07        | 0.13        | 100.04        | 0.990                | -            | 0.000        | 0.983        | 0.001        | 1.975        | 2.023        | 0.002        | 2.025        | 0.975        |
| <b>Mean (2)</b>                           | <b>34.78</b> | <b>0.04</b> | <b>30.19</b> | <b>0.05</b> | <b>0.13</b> | <b>35.38</b> | <b>0.04</b> | <b>0.09</b> | <b>100.63</b> | <b>0.998</b>         | <b>0.001</b> | <b>0.000</b> | <b>0.986</b> | <b>0.001</b> | <b>1.986</b> | <b>2.013</b> | <b>0.001</b> | <b>2.014</b> | <b>0.986</b> |
| 374Cp                                     | 35.10        | <dl         | 30.35        | <dl         | 0.07        | 33.99        | <dl         | 0.03        | 99.51         | 1.025                | -            | -            | 1.008        | 0.001        | 2.033        | 1.967        | -            | 1.967        | 1.034        |
| <b>Mean (1)</b>                           | <b>35.10</b> | <dl         | <b>30.35</b> | <dl         | <b>0.07</b> | <b>33.99</b> | <dl         | <b>0.03</b> | <b>99.51</b>  | <b>1.025</b>         | -            | -            | <b>1.008</b> | <b>0.001</b> | <b>2.033</b> | <b>1.967</b> | -            | <b>1.967</b> | <b>1.034</b> |
| 321Cp-1                                   | 33.67        | <dl         | 29.82        | <dl         | 0.12        | 35.14        | <dl         | 0.03        | 98.81         | 0.981                | -            | -            | 0.989        | 0.001        | 1.971        | 2.029        | -            | 2.029        | 0.971        |
| 321Cp-2                                   | 33.42        | <dl         | 29.98        | <dl         | 0.09        | 35.18        | 0.04        | 0.04        | 98.71         | 0.973                | -            | -            | 0.993        | 0.001        | 1.968        | 2.031        | 0.001        | 2.032        | 0.968        |
| 321Cp-3                                   | 33.65        | <dl         | 30.04        | <dl         | 0.15        | 35.29        | 0.08        | 0.03        | 99.20         | 0.976                | -            | -            | 0.992        | 0.001        | 1.969        | 2.029        | 0.002        | 2.031        | 0.969        |
| 321Cp-4                                   | 33.47        | <dl         | 30.16        | 0.04        | 0.09        | 35.25        | 0.06        | 0.04        | 99.07         | 0.972                | -            | 0.000        | 0.996        | 0.001        | 1.969        | 2.029        | 0.001        | 2.031        | 0.970        |
| <b>Mean (4)</b>                           | <b>33.55</b> | <dl         | <b>30.00</b> | <b>0.01</b> | <b>0.11</b> | <b>35.22</b> | <b>0.04</b> | <b>0.04</b> | <b>98.95</b>  | <b>0.976</b>         | -            | <b>0.000</b> | <b>0.993</b> | <b>0.001</b> | <b>1.969</b> | <b>2.030</b> | <b>0.001</b> | <b>2.031</b> | <b>0.970</b> |
| 355Cp-1                                   | 34.19        | <dl         | 29.46        | <dl         | 0.10        | 35.63        | 0.04        | 0.08        | 99.41         | 0.988                | -            | -            | 0.969        | 0.001        | 1.958        | 2.041        | 0.001        | 2.042        | 0.959        |

|                                       |              |             |              |             |             |              |             |             |               |                      |              |              |              |              |              |              |              |              |              |
|---------------------------------------|--------------|-------------|--------------|-------------|-------------|--------------|-------------|-------------|---------------|----------------------|--------------|--------------|--------------|--------------|--------------|--------------|--------------|--------------|--------------|
| 355Cp-2                               | 34.47        | <dl         | 29.85        | <dl         | 0.13        | 35.05        | <dl         | 0.06        | 99.51         | 1.000                | -            | -            | 0.985        | 0.001        | 1.986        | 2.014        | -            | 2.014        | 0.986        |
| 355Cp-3                               | 34.18        | <dl         | 29.62        | <dl         | 0.14        | 35.81        | <dl         | 0.04        | 99.74         | 0.984                | -            | -            | 0.970        | 0.001        | 1.956        | 2.044        | -            | 2.044        | 0.957        |
| 355Cp-4                               | 34.68        | <dl         | 30.51        | <dl         | 0.15        | 34.95        | <dl         | 0.03        | 100.29        | 1.000                | -            | -            | 1.001        | 0.001        | 2.002        | 1.998        | -            | 1.998        | 1.002        |
| 355Cp-5                               | 34.67        | <dl         | 30.27        | <dl         | 0.13        | 34.92        | 0.06        | 0.05        | 100.06        | 1.002                | -            | -            | 0.995        | 0.001        | 1.998        | 2.000        | 0.001        | 2.002        | 0.998        |
| <b>Mean (5)</b>                       | <b>34.44</b> | <dl         | <b>29.94</b> | <dl         | <b>0.13</b> | <b>35.27</b> | <b>0.02</b> | <b>0.05</b> | <b>99.80</b>  | <b>0.995</b>         | -            | -            | <b>0.984</b> | <b>0.001</b> | <b>1.980</b> | <b>2.020</b> | <b>0.000</b> | <b>2.020</b> | <b>0.980</b> |
| Chalcocite (Cu <sub>2</sub> S) (wt.%) |              |             |              |             |             |              |             |             |               | Formula (to 3 atoms) |              |              |              |              |              |              |              |              |              |
| 374Cc-1                               | 77.20        | 0.06        | 1.93         | 0.03        | 0.14        | 22.55        | 0.08        | <dl         | 102.09        | 1.864                | 0.001        | 0.000        | 0.053        | 0.001        | 1.919        | 1.079        | 0.002        | 1.081        | 1.775        |
| 374Cc-2                               | 76.42        | 0.16        | 1.76         | 0.09        | 0.11        | 23.14        | 0.07        | <dl         | 101.75        | 1.841                | 0.002        | 0.001        | 0.048        | 0.001        | 1.894        | 1.105        | 0.001        | 1.106        | 1.711        |
| 374Cc-3                               | 75.61        | <dl         | 2.38         | <dl         | 0.15        | 22.61        | <dl         | 0.02        | 100.79        | 1.841                | -            | -            | 0.066        | 0.001        | 1.908        | 1.092        | -            | 1.092        | 1.748        |
| <b>Mean (3)</b>                       | <b>76.41</b> | <b>0.07</b> | <b>2.02</b>  | <b>0.04</b> | <b>0.13</b> | <b>22.77</b> | <b>0.05</b> | <b>0.01</b> | <b>101.55</b> | <b>1.849</b>         | <b>0.001</b> | <b>0.000</b> | <b>0.056</b> | <b>0.001</b> | <b>1.907</b> | <b>1.092</b> | <b>0.001</b> | <b>1.093</b> | <b>1.745</b> |

Note: <dl, below minimum limit of detection.

**Table S2.** EPMA data for common Cu-Bi-sulphosalts (wittichenite and aikinite) of the Zhibula Cu skarn.

|            | Cu                            | Ag   | Fe   | Cd   | Pb    | Mn   | Bi    | S     | Te   | Se   | Total  | Cu                   | Ag    | Pb    | Fe    | Cd    | Cu+Ag+Fe | Pb+Cd | Bi    | Bi+Sb+As | Total M | S     | Te    | Se    | S(+Te+Se) | Charge M | Charge S | mean  | diff.  | diff (%) |  |
|------------|-------------------------------|------|------|------|-------|------|-------|-------|------|------|--------|----------------------|-------|-------|-------|-------|----------|-------|-------|----------|---------|-------|-------|-------|-----------|----------|----------|-------|--------|----------|--|
|            | Wittichenite (Cu3BiS5) (wt.%) |      |      |      |       |      |       |       |      |      |        | Formula (to 7 atoms) |       |       |       |       |          |       |       |          |         |       |       |       |           |          |          |       |        |          |  |
| 374Witt-1  | 38.79                         | 0.30 | 0.60 | 0.09 | <dl   | <dl  | 39.25 | 19.87 | <dl  | 0.07 | 98.97  | 2.981                | 0.013 | -     | 0.053 | 0.004 | 3.047    | 0.004 | 0.917 | 0.917    | 3.968   | 3.028 | -     | 0.004 | 3.032     | 5.859    | 6.063    | 5.961 | -0.204 | -3.421   |  |
| 374Witt-2  | 39.23                         | 0.39 | 0.67 | <dl  | <dl   | <dl  | 39.15 | 19.96 | <dl  | 0.11 | 99.51  | 2.992                | 0.017 | -     | 0.058 | -     | 3.068    | -     | 0.908 | 0.908    | 3.976   | 3.017 | -     | 0.007 | 3.024     | 5.850    | 6.048    | 5.949 | -0.198 | -3.328   |  |
| 374Witt-3  | 39.56                         | 0.38 | 0.90 | 0.06 | <dl   | <dl  | 40.42 | 20.12 | <dl  | <dl  | 101.44 | 2.977                | 0.017 | -     | 0.077 | 0.003 | 3.071    | 0.003 | 0.925 | 0.925    | 3.999   | 3.001 | -     | -     | 3.001     | 5.928    | 6.003    | 5.965 | -0.075 | -1.251   |  |
| 374Witt-4  | 39.80                         | 0.50 | 1.16 | 0.08 | <dl   | <dl  | 39.39 | 19.80 | <dl  | 0.05 | 100.79 | 3.004                | 0.022 | -     | 0.100 | 0.003 | 3.126    | 0.003 | 0.904 | 0.904    | 4.034   | 2.963 | -     | 0.003 | 2.966     | 5.946    | 5.932    | 5.939 | 0.014  | 0.229    |  |
| Mean (4)   | 39.35                         | 0.39 | 0.83 | 0.08 | <dl   | <dl  | 39.55 | 19.94 | <dl  | 0.08 | 100.18 | 2.989                | 0.017 | -     | 0.072 | 0.003 | 3.078    | 0.003 | 0.914 | 0.914    | 3.994   | 3.002 | -     | 0.005 | 3.006     | 5.896    | 6.012    | 5.954 | -0.116 | -1.943   |  |
| 180Witt-1  | 38.03                         | 0.08 | 0.54 | 0.06 | <dl   | 0.02 | 41.68 | 20.27 | <dl  | 0.21 | 100.89 | 2.902                | 0.004 | -     | 0.047 | 0.002 | 2.952    | 0.002 | 0.967 | 0.967    | 3.922   | 3.065 | -     | 0.013 | 3.078     | 5.906    | 6.156    | 6.031 | -0.250 | -4.153   |  |
| 180Witt-2  | 37.88                         | <dl  | 0.87 | 0.06 | <dl   | 0.04 | 41.89 | 20.45 | <dl  | 0.27 | 101.45 | 2.870                | -     | -     | 0.075 | 0.002 | 2.945    | 0.002 | 0.965 | 0.965    | 3.912   | 3.071 | -     | 0.016 | 3.088     | 5.920    | 6.175    | 6.047 | -0.255 | -4.219   |  |
| 180Witt-3  | 37.59                         | 0.19 | 0.62 | 0.04 | <dl   | 0.03 | 40.57 | 19.39 | <dl  | 1.04 | 99.47  | 2.922                | 0.009 | -     | 0.055 | 0.002 | 2.986    | 0.002 | 0.959 | 0.959    | 3.947   | 2.988 | -     | 0.065 | 3.053     | 5.922    | 6.106    | 6.014 | -0.185 | -3.072   |  |
| 180Witt-4  | 37.00                         | <dl  | <dl  | 0.05 | <dl   | <dl  | 41.86 | 20.25 | <dl  | 0.21 | 99.38  | 2.875                | -     | -     | -     | 0.002 | 2.875    | 0.002 | 0.989 | 0.989    | 3.867   | 3.120 | -     | 0.013 | 3.133     | 5.848    | 6.266    | 6.057 | -0.418 | -6.904   |  |
| 180Witt-5  | 37.94                         | 0.22 | <dl  | <dl  | <dl   | <dl  | 41.78 | 20.42 | <dl  | 0.09 | 100.45 | 2.908                | 0.010 | -     | -     | -     | 2.918    | -     | 0.974 | 0.974    | 3.892   | 3.102 | -     | 0.006 | 3.108     | 5.840    | 6.215    | 6.028 | -0.375 | -6.226   |  |
| 180Witt-6  | 37.08                         | 0.11 | <dl  | <dl  | <dl   | 0.08 | 40.89 | 19.90 | <dl  | 0.31 | 98.41  | 2.907                | 0.005 | -     | -     | -     | 2.912    | -     | 0.975 | 0.976    | 3.888   | 3.092 | -     | 0.020 | 3.112     | 5.841    | 6.223    | 6.032 | -0.383 | -6.342   |  |
| 180Witt-7  | 37.18                         | 0.10 | <dl  | <dl  | <dl   | 0.05 | 41.65 | 19.95 | <dl  | 0.34 | 99.27  | 2.900                | 0.005 | -     | -     | -     | 2.905    | -     | 0.988 | 0.988    | 3.893   | 3.085 | -     | 0.022 | 3.107     | 5.869    | 6.214    | 6.042 | -0.344 | -5.699   |  |
| 180Witt-8  | 36.88                         | 0.08 | <dl  | 0.05 | <dl   | 0.05 | 41.66 | 20.04 | <dl  | 0.35 | 99.11  | 2.880                | 0.004 | -     | -     | 0.002 | 2.884    | 0.002 | 0.989 | 0.989    | 3.876   | 3.102 | -     | 0.022 | 3.124     | 5.857    | 6.248    | 6.053 | -0.391 | -6.468   |  |
| 180Witt-9  | 37.57                         | 0.14 | <dl  | <dl  | <dl   | <dl  | 41.46 | 20.22 | <dl  | 0.26 | 99.69  | 2.904                | 0.006 | -     | -     | -     | 2.910    | -     | 0.974 | 0.976    | 3.886   | 3.098 | -     | 0.016 | 3.114     | 5.838    | 6.228    | 6.033 | -0.390 | -6.461   |  |
| 180Witt-10 | 37.51                         | 0.18 | <dl  | 0.06 | <dl   | 0.03 | 40.96 | 20.21 | <dl  | 0.35 | 99.30  | 2.903                | 0.008 | -     | -     | 0.003 | 2.911    | 0.003 | 0.964 | 0.964    | 3.878   | 3.101 | -     | 0.022 | 3.122     | 5.808    | 6.245    | 6.026 | -0.437 | -7.245   |  |
| Mean (10)  | 38.00                         | 0.19 | 0.77 | 0.04 | <dl   | 0.02 | 40.90 | 20.06 | <dl  | 0.26 | 99.87  | 2.923                | 0.009 | -     | 0.033 | 0.002 | 2.965    | 0.002 | 0.957 | 0.957    | 3.924   | 3.060 | -     | 0.016 | 3.076     | 5.874    | 6.152    | 6.013 | -0.278 | -4.611   |  |
|            | Aikinite (PbCuBiS3) (wt.%)    |      |      |      |       |      |       |       |      |      |        | Formula (to 6 atoms) |       |       |       |       |          |       |       |          |         |       |       |       |           |          |          |       |        |          |  |
| 180Aik-1   | 10.86                         | <dl  | 0.07 | <dl  | 36.08 | 0.03 | 36.07 | 15.87 | <dl  | 0.90 | 99.88  | 1.000                | -     | 1.019 | 0.008 | -     | 1.007    | 1.019 | 1.010 | 1.010    | 3.036   | 2.897 | -     | 0.066 | 2.964     | 6.083    | 5.927    | 6.005 | 0.156  | 2.592    |  |
| 180Aik-2   | 10.87                         | <dl  | 0.19 | <dl  | 35.11 | 0.03 | 36.67 | 16.01 | <dl  | 0.97 | 99.85  | 0.995                | -     | 0.986 | 0.020 | -     | 1.015    | 0.986 | 1.021 | 1.021    | 3.022   | 2.906 | -     | 0.072 | 2.978     | 6.071    | 5.955    | 6.013 | 0.116  | 1.922    |  |
| 180Aik-3   | 10.98                         | <dl  | 0.31 | <dl  | 35.22 | <dl  | 36.95 | 15.82 | 0.02 | 0.99 | 100.28 | 1.005                | -     | 0.989 | 0.032 | -     | 1.037    | 0.989 | 1.029 | 1.029    | 3.055   | 2.871 | 0.001 | 0.073 | 2.945     | 6.135    | 5.889    | 6.012 | 0.246  | 4.085    |  |
| 180Aik-4   | 10.59                         | <dl  | 0.81 | <dl  | 36.22 | <dl  | 37.52 | 16.51 | <dl  | 0.42 | 102.06 | 0.947                | -     | 0.994 | 0.082 | -     | 1.029    | 0.994 | 1.021 | 1.021    | 3.044   | 2.927 | -     | 0.030 | 2.956     | 6.161    | 5.913    | 6.037 | 0.248  | 4.104    |  |
| 180Aik-5   | 10.71                         | <dl  | 0.42 | 0.06 | 35.51 | <dl  | 37.27 | 16.23 | <dl  | 0.48 | 100.68 | 0.974                | -     | 0.990 | 0.044 | 0.003 | 1.018    | 0.993 | 1.030 | 1.030    | 3.041   | 2.924 | -     | 0.035 | 2.959     | 6.139    | 5.918    | 6.028 | 0.221  | 3.662    |  |
| 180Aik-6   | 10.70                         | <dl  | 0.78 | 0.13 | 35.37 | <dl  | 37.50 | 16.28 | <dl  | 0.46 | 101.23 | 0.965                | -     | 0.978 | 0.080 | 0.006 | 1.045    | 0.984 | 1.028 | 1.028    | 3.057   | 2.909 | -     | 0.034 | 2.943     | 6.178    | 5.885    | 6.032 | 0.292  | 4.844    |  |
| 180Aik-7   | 10.66                         | <dl  | 0.86 | 0.14 | 35.86 | 0.03 | 37.38 | 16.86 | <dl  | 0.32 | 102.11 | 1.101                | -     | 1.136 | 0.101 | 0.008 | 1.202    | 1.144 | 1.174 | 1.174    | 3.520   | 3.453 | -     | 0.027 | 3.480     | 7.114    | 6.959    | 7.037 | 0.155  | 2.198    |  |
| 180Aik-8   | 10.75                         | <dl  | 0.75 | <dl  | 35.29 | 0.03 | 37.56 | 16.91 | <dl  | 0.33 | 101.62 | 1.113                | -     | 1.120 | 0.088 | -     | 1.201    | 1.120 | 1.182 | 1.182    | 3.504   | 3.469 | -     | 0.027 | 3.496     | 7.076    | 6.993    | 7.035 | 0.084  | 1.190    |  |
| 180Aik-9   | 10.92                         | <dl  | <dl  | 0.06 | 35.22 | <dl  | 36.88 | 16.52 | <dl  | 0.44 | 100.04 | 1.157                | -     | 1.145 | -     | 0.004 | 1.157    | 1.148 | 1.188 | 1.188    | 3.493   | 3.470 | -     | 0.037 | 3.507     | 7.018    | 7.014    | 7.016 | 0.004  | 0.053    |  |
| 180Aik-10  | 10.69                         | <dl  | <dl  | 0.05 | 35.72 | <dl  | 36.60 | 15.70 | <dl  | 0.98 | 99.73  | 1.157                | -     | 1.185 | -     | 0.003 | 1.157    | 1.188 | 1.204 | 1.204    | 3.549   | 3.366 | -     | 0.086 | 3.451     | 7.145    | 6.903    | 7.024 | 0.242  | 3.445    |  |
| 180Aik-11  | 10.54                         | <dl  | <dl  | 0.06 | 35.20 | <dl  | 36.73 | 15.99 | <dl  | 1.07 | 99.59  | 1.133                | -     | 1.161 | -     | 0.004 | 1.133    | 1.165 | 1.201 | 1.201    | 3.499   | 3.408 | -     | 0.092 | 3.501     | 7.066    | 7.002    | 7.034 | 0.064  | 0.915    |  |
| Mean (11)  | 10.75                         | <dl  | 0.53 | 0.04 | 35.53 | 0.01 | 37.01 | 16.25 | 0.00 | 0.67 | 100.64 | 1.050                | -     | 1.064 | 0.041 | 0.002 | 1.091    | 1.066 | 1.099 | 1.099    | 3.256   | 3.145 | 0.000 | 0.053 | 3.198     | 6.562    | 6.396    | 6.479 | 0.166  | 2.637    |  |

Note: <dl, below minimum limit of detection.

**Table S3.** EPMA data for Bi-chalcogenides of the Zhibula Cu skarn.

|        | Tetradymite (Bi <sub>2</sub> Te <sub>2</sub> S) (wt.%) |      |      |      |       |      | Formula (to 5 atoms) |      |        |       |       |       |       |          |       |       |         |       |       |       |           |
|--------|--------------------------------------------------------|------|------|------|-------|------|----------------------|------|--------|-------|-------|-------|-------|----------|-------|-------|---------|-------|-------|-------|-----------|
|        | Cu                                                     | Ag   | Cd   | Pb   | Bi    | S    | Te                   | Se   | Total  | Cu    | Ag    | Pb    | Cd    | Cu+Ag+Fe | Pb+Cd | Bi    | Total M | S     | Te    | Se    | S(+Te+Se) |
| 180-1  | 0.12                                                   | <dl  | 0.06 | 0.06 | 59.11 | 5.00 | 35.67                | 1.08 | 101.10 | 0.013 | -     | 0.002 | 0.004 | 0.013    | 0.005 | 1.925 | 1.943   | 1.061 | 1.903 | 0.093 | 3.057     |
| 180-2  | 0.06                                                   | 0.10 | <dl  | 0.08 | 58.02 | 4.45 | 37.21                | 1.18 | 101.09 | 0.006 | 0.006 | 0.003 | -     | 0.013    | 0.003 | 1.915 | 1.930   | 0.957 | 2.011 | 0.103 | 3.070     |
| 180-3  | 0.05                                                   | <dl  | <dl  | 0.13 | 57.80 | 4.43 | 37.13                | 1.24 | 100.80 | 0.006 | -     | 0.004 | -     | 0.006    | 0.004 | 1.913 | 1.923   | 0.956 | 2.012 | 0.109 | 3.077     |
| 180-4  | 0.09                                                   | <dl  | <dl  | <dl  | 59.13 | 5.02 | 35.75                | 1.05 | 101.04 | 0.010 | -     | -     | -     | 0.010    | -     | 1.926 | 1.936   | 1.066 | 1.907 | 0.091 | 3.064     |
| 180-5  | 0.09                                                   | <dl  | <dl  | 0.12 | 59.05 | 4.56 | 35.69                | 2.14 | 101.65 | 0.010 | -     | 0.004 | -     | 0.010    | 0.004 | 1.925 | 1.939   | 0.970 | 1.906 | 0.185 | 3.061     |
| 180-6  | 0.09                                                   | <dl  |      | 0.08 | 59.51 | 5.05 | 34.33                | 0.74 | 99.80  | 0.009 | -     | 0.003 | -     | 0.009    | 0.003 | 1.971 | 1.983   | 1.090 | 1.862 | 0.065 | 3.017     |
| 180-7  | 0.12                                                   | <dl  | 0.06 | 0.06 | 59.11 | 5.00 | 35.67                | 1.08 | 101.10 | 0.013 | -     | 0.002 | 0.004 | 0.013    | 0.005 | 1.925 | 1.943   | 1.061 | 1.903 | 0.093 | 3.057     |
| 180-8  | <dl                                                    | 0.12 | 0.14 | <dl  | 58.99 | 5.00 | 35.67                | 1.47 | 101.39 | -     | 0.008 | -     | 0.009 | 0.008    | 0.009 | 1.910 | 1.926   | 1.056 | 1.892 | 0.126 | 3.074     |
| 180-9  | 0.07                                                   | 0.22 | 0.10 | <dl  | 57.63 | 4.61 | 34.92                | 1.54 | 99.09  | 0.007 | 0.014 | -     | 0.006 | 0.022    | 0.006 | 1.924 | 1.952   | 1.004 | 1.909 | 0.136 | 3.048     |
| 180-10 | 0.10                                                   | 0.17 | <dl  | 0.10 | 57.60 | 4.72 | 34.61                | 1.53 | 98.82  | 0.011 | 0.011 | 0.003 | -     | 0.022    | 0.003 | 1.922 | 1.948   | 1.026 | 1.891 | 0.136 | 3.052     |
| 180-11 | 0.08                                                   | 0.13 | <dl  | 0.04 | 58.21 | 4.75 | 34.61                | 1.43 | 99.26  | 0.009 | 0.008 | 0.001 | -     | 0.017    | 0.001 | 1.938 | 1.956   | 1.030 | 1.887 | 0.126 | 3.044     |
| 180-12 | <dl                                                    | 0.13 | 0.11 | 0.04 | 58.64 | 4.56 | 35.53                | 1.49 | 100.50 | -     | 0.008 | 0.001 | 0.007 | 0.008    | 0.008 | 1.942 | 1.959   | 0.984 | 1.927 | 0.130 | 3.041     |
| 180-13 | 0.08                                                   | <dl  | <dl  | <dl  | 58.31 | 4.81 | 34.90                | 1.48 | 99.57  | 0.008 | -     | -     | -     | 0.008    | -     | 1.931 | 1.940   | 1.038 | 1.893 | 0.129 | 3.060     |
| 180-14 | 0.13                                                   | <dl  | 0.05 | 0.05 | 56.83 | 4.16 | 35.25                | 2.03 | 98.51  | 0.015 | -     | 0.002 | 0.003 | 0.015    | 0.005 | 1.925 | 1.945   | 0.917 | 1.956 | 0.182 | 3.055     |
| 180-15 | 0.10                                                   | <dl  | 0.11 | 0.05 | 57.88 | 4.28 | 35.33                | 2.17 | 99.91  | 0.010 | -     | 0.002 | 0.007 | 0.010    | 0.008 | 1.931 | 1.950   | 0.929 | 1.930 | 0.191 | 3.050     |

Note: &lt;dl, below minimum limit of detection.

**Table S4.** EPMA data for Au-Ag-tellurides of the Zhibula Cu skarn.

|         | Hessite ( $\text{Ag}_2\text{Te}$ ) (wt.%) |      |      |       |      |       | Formula (to 3 atoms) |      |        |       |       |       |         |       |       |       |       |       |         |
|---------|-------------------------------------------|------|------|-------|------|-------|----------------------|------|--------|-------|-------|-------|---------|-------|-------|-------|-------|-------|---------|
|         | S                                         | Se   | Cu   | Ag    | Hg   | Te    | Bi                   | Au   | Total  | S     | Se    | Te    | S+Se+Te | Cu    | Ag    | Hg    | Bi    | Au    | Total M |
| 8Hs-1   | 0.04                                      | 0.06 | 0.37 | 63.82 | 0.12 | 38.13 | <dl                  | <dl  | 102.53 | 0.005 | 0.002 | 0.997 | 1.004   | 0.019 | 1.974 | 0.002 | -     | -     | 1.996   |
| 8Hs-2   | 0.11                                      | 0.06 | <dl  | 59.35 | 0.15 | 40.83 | 0.04                 | <dl  | 100.53 | 0.011 | 0.003 | 1.097 | 1.111   | 0.000 | 1.886 | 0.003 | 0.001 | -     | 1.889   |
| 8Hs-3   | 0.06                                      | 0.05 | 0.22 | 63.31 | <dl  | 37.37 | <dl                  | <dl  | 100.99 | 0.006 | 0.002 | 0.992 | 1.000   | 0.012 | 1.988 | -     | -     | -     | 2.000   |
| 8Hs-4   | 0.07                                      | 0.09 | 0.42 | 63.57 | 0.22 | 37.44 | <dl                  | 0.15 | 101.97 | 0.007 | 0.004 | 0.984 | 0.995   | 0.022 | 1.976 | 0.004 | -     | 0.003 | 2.005   |
| 8Hs-5   | 0.07                                      | 0.10 | 0.28 | 62.94 | 0.09 | 37.66 | 0.05                 | 0.32 | 101.51 | 0.008 | 0.004 | 0.996 | 1.008   | 0.015 | 1.969 | 0.002 | 0.001 | 0.006 | 1.992   |
| 8Hs-6   | 0.05                                      | 0.19 | 0.53 | 63.72 | 0.14 | 37.65 | <dl                  | <dl  | 102.28 | 0.005 | 0.008 | 0.985 | 0.998   | 0.028 | 1.972 | 0.002 | -     | -     | 2.002   |
| 8Hs-7   | 0.10                                      | 0.00 | <dl  | 63.79 | <dl  | 38.36 | 0.07                 | <dl  | 102.33 | 0.011 | -     | 1.007 | 1.018   | -     | 1.981 | -     | 0.001 | -     | 1.982   |
| 374Hs-1 | 0.14                                      | 0.26 | <dl  | 63.36 | 0.22 | 36.23 | <dl                  | 0.17 | 100.38 | 0.015 | 0.011 | 0.967 | 0.993   | -     | 2.000 | 0.004 | -     | 0.003 | 2.007   |
| 374Hs-2 | 0.18                                      | 0.14 | <dl  | 63.71 | 0.15 | 37.77 | <dl                  | 0.21 | 102.16 | 0.019 | 0.006 | 0.991 | 1.016   | -     | 1.978 | 0.003 | -     | 0.004 | 1.984   |
| 374Hs-3 | 0.20                                      | 0.12 | <dl  | 64.14 | 0.12 | 37.91 | <dl                  | 0.34 | 102.82 | 0.021 | 0.005 | 0.988 | 1.014   | -     | 1.978 | 0.002 | -     | 0.006 | 1.986   |
| 374Hs-4 | 0.12                                      | 0.23 | <dl  | 63.81 | 0.13 | 36.85 | 0.07                 | <dl  | 101.21 | 0.012 | 0.010 | 0.976 | 0.998   | -     | 1.999 | 0.002 | 0.001 | 0.000 | 2.002   |

Note: &lt;dl, below minimum limit of detection.



**Table S5.** EPMA data for carrollite of the Zhibula Cu skarn.

|                 | Carrollite (CuCo <sub>1.5</sub> Ni <sub>0.5</sub> S <sub>4</sub> ) (wt.%) |             |             |             |              |              |              |             |             |               | Formula (to 7 atoms) |              |              |              |              |              |              |              |              |              |              |
|-----------------|---------------------------------------------------------------------------|-------------|-------------|-------------|--------------|--------------|--------------|-------------|-------------|---------------|----------------------|--------------|--------------|--------------|--------------|--------------|--------------|--------------|--------------|--------------|--------------|
|                 | S                                                                         | Pb          | Se          | Fe          | Cu           | Ni           | Co           | Te          | Bi          | Total         | S                    | Se           | Te           | S+Se+Te      | Pb           | Fe           | Cu           | Ni           | Co           | Bi           | Total M      |
| 372Car?-1       | 41.37                                                                     | 0.11        | 0.03        | 2.44        | 14.31        | 11.25        | 30.45        | 0.03        | 0.12        | 100.11        | 3.980                | 0.001        | 0.001        | 3.982        | 0.002        | 0.135        | 0.695        | 0.591        | 1.594        | 0.002        | 3.018        |
| 372Car?-2       | 40.45                                                                     | 0.07        | <dl         | 4.07        | 18.18        | 10.03        | 26.07        | 0.05        | 0.16        | 99.08         | 3.950                | -            | 0.001        | 3.952        | 0.001        | 0.228        | 0.896        | 0.535        | 1.386        | 0.002        | 3.048        |
| 372Car?-3       | 41.09                                                                     | 0.09        | <dl         | 2.53        | 15.42        | 10.88        | 29.71        | 0.07        | 0.10        | 99.88         | 3.968                | -            | 0.002        | 3.970        | 0.001        | 0.140        | 0.751        | 0.574        | 1.561        | 0.001        | 3.030        |
| <b>Mean (3)</b> | <b>40.97</b>                                                              | <b>0.09</b> | <b>0.03</b> | <b>3.01</b> | <b>15.97</b> | <b>10.72</b> | <b>28.74</b> | <b>0.05</b> | <b>0.12</b> | <b>99.69</b>  | <b>3.966</b>         | <b>0.000</b> | <b>0.001</b> | <b>3.968</b> | <b>0.001</b> | <b>0.168</b> | <b>0.781</b> | <b>0.567</b> | <b>1.514</b> | <b>0.002</b> | <b>3.032</b> |
| 8Car?-1         | 42.19                                                                     | 0.14        | 0.04        | 0.06        | 12.75        | 9.93         | 36.23        | 0.05        | 0.11        | 101.50        | 3.998                | 0.002        | 0.001        | 4.001        | 0.002        | 0.003        | 0.609        | 0.514        | 1.868        | 0.002        | 2.999        |
| 8Car?-2         | 41.92                                                                     | 0.12        | 0.05        | 0.07        | 12.63        | 9.91         | 36.24        | 0.07        | 0.10        | 101.11        | 3.990                | 0.002        | 0.002        | 3.994        | 0.002        | 0.004        | 0.607        | 0.515        | 1.877        | 0.001        | 3.006        |
| 8Car?-3         | 42.31                                                                     | 0.08        | 0.08        | 0.05        | 12.31        | 10.96        | 35.07        | 0.02        | 0.17        | 101.17        | 4.017                | 0.003        | -            | 4.021        | 0.001        | 0.003        | 0.590        | 0.569        | 1.812        | 0.002        | 2.979        |
| 8Car?-4         | 42.01                                                                     | 0.10        | <dl         | 0.09        | 12.35        | 10.85        | 35.09        | 0.02        | 0.16        | 100.67        | 4.009                | -            | -            | 4.009        | 0.001        | 0.005        | 0.595        | 0.566        | 1.822        | 0.002        | 2.991        |
| 8Car?-5         | 42.18                                                                     | 0.16        | 0.05        | 0.07        | 12.16        | 11.12        | 34.80        | 0.02        | 0.13        | 100.69        | 4.020                | 0.002        | 0.001        | 4.023        | 0.002        | 0.004        | 0.585        | 0.579        | 1.805        | 0.002        | 2.977        |
| <b>Mean (5)</b> | <b>42.12</b>                                                              | <b>0.12</b> | <b>0.06</b> | <b>0.07</b> | <b>12.44</b> | <b>10.55</b> | <b>35.49</b> | <b>0.04</b> | <b>0.13</b> | <b>101.03</b> | <b>4.007</b>         | <b>0.002</b> | <b>0.001</b> | <b>4.009</b> | <b>0.002</b> | <b>0.004</b> | <b>0.597</b> | <b>0.549</b> | <b>1.837</b> | <b>0.002</b> | <b>2.991</b> |

Note: <dl, below minimum limit of detection.

**Table S6.** EPMA data for pyrrhotite and pentlandite of the Zhibula Cu skarn.

|          | Pyrrhotite ( $\text{Fe}_{(1-x)}\text{S}$ ( $x=0-0.17$ )) (wt.%) |       |       |      |        | Formula (to 2 atoms; at S=1) |       |       |         |                       |       |       |         |       |       |       |       |       |         |
|----------|-----------------------------------------------------------------|-------|-------|------|--------|------------------------------|-------|-------|---------|-----------------------|-------|-------|---------|-------|-------|-------|-------|-------|---------|
|          | S                                                               | Fe    | Ni    | Co   | Total  | Fe                           | Ni    | Co    | Total M | S                     | M/S   | x     | 1/2x    |       |       |       |       |       |         |
| 321Po-1  | 38.43                                                           | 60.67 | 0.90  | <dl  | 100.00 | 0.906                        | 0.008 | -     | 0.914   | 1.000                 | 0.914 | 0.086 | 5.812   |       |       |       |       |       |         |
| 321Po-2  | 38.85                                                           | 58.11 | 0.84  | <dl  | 97.79  | 0.859                        | 0.007 | -     | 0.866   | 1.000                 | 0.866 | 0.134 | 3.722   |       |       |       |       |       |         |
| 321Po-3  | 38.07                                                           | 60.36 | 0.90  | <dl  | 99.32  | 0.910                        | 0.008 | -     | 0.918   | 1.000                 | 0.918 | 0.082 | 6.084   |       |       |       |       |       |         |
| 321Po-4  | 38.90                                                           | 58.69 | 0.91  | <dl  | 98.51  | 0.866                        | 0.008 | -     | 0.874   | 1.000                 | 0.874 | 0.126 | 3.960   |       |       |       |       |       |         |
| 321Po-5  | 38.99                                                           | 60.21 | 0.71  | <dl  | 99.91  | 0.887                        | 0.006 | -     | 0.892   | 1.000                 | 0.892 | 0.108 | 4.646   |       |       |       |       |       |         |
| 321Po-6  | 39.71                                                           | 59.95 | 0.63  | <dl  | 100.29 | 0.867                        | 0.005 | -     | 0.872   | 1.000                 | 0.872 | 0.128 | 3.901   |       |       |       |       |       |         |
| 321Po-7  | 39.36                                                           | 59.56 | 0.85  | <dl  | 99.76  | 0.869                        | 0.007 | -     | 0.876   | 1.000                 | 0.876 | 0.124 | 4.018   |       |       |       |       |       |         |
| 321Po-8  | 38.32                                                           | 59.11 | 0.87  | <dl  | 98.30  | 0.885                        | 0.007 | -     | 0.893   | 1.000                 | 0.893 | 0.107 | 4.659   |       |       |       |       |       |         |
| 321Po-9  | 38.34                                                           | 59.80 | 0.86  | <dl  | 99.00  | 0.895                        | 0.007 | -     | 0.903   | 1.000                 | 0.903 | 0.097 | 5.129   |       |       |       |       |       |         |
| 321Po-10 | 38.54                                                           | 59.78 | 0.74  | <dl  | 99.06  | 0.890                        | 0.006 | -     | 0.897   | 1.000                 | 0.897 | 0.103 | 4.835   |       |       |       |       |       |         |
| 321Po-11 | 38.32                                                           | 59.51 | 0.88  | 0.15 | 98.86  | 0.892                        | 0.007 | 0.001 | 0.900   | 1.000                 | 0.900 | 0.100 | 5.008   |       |       |       |       |       |         |
| 321Po-12 | 38.26                                                           | 59.25 | 0.89  | 0.13 | 98.52  | 0.889                        | 0.007 | 0.001 | 0.897   | 1.000                 | 0.897 | 0.103 | 4.874   |       |       |       |       |       |         |
|          | Pentlandite ( $(\text{Fe,Ni})_9\text{S}_8$ ) (wt.%)             |       |       |      |        |                              |       |       |         | Formula (to 17 atoms) |       |       |         |       |       |       |       |       |         |
|          | S                                                               | Se    | Fe    | Ag   | Ni     | Co                           | Te    | Bi    | Total   | S                     | Se    | Te    | S+Se+Te | Fe    | Ag    | Ni    | Co    | Bi    | Total M |
| 321Pn-1  | 34.11                                                           | 0.05  | 35.14 | <dl  | 27.00  | 3.22                         | <dl   | 0.20  | 99.73   | 8.185                 | 0.005 | -     | 8.190   | 4.842 | -     | 3.540 | 0.420 | 0.007 | 8.810   |
| 321Pn-2  | 34.03                                                           | 0.08  | 34.65 | 0.06 | 27.21  | 3.16                         | <dl   | 0.17  | 99.35   | 8.196                 | 0.008 | -     | 8.203   | 4.792 | 0.002 | 3.581 | 0.415 | 0.006 | 8.797   |
| 321Pn-3  | 34.66                                                           | 0.05  | 32.97 | <dl  | 28.71  | 3.01                         | 0.03  | 0.07  | 99.51   | 8.304                 | 0.005 | 0.002 | 8.311   | 4.535 | -     | 3.759 | 0.392 | 0.003 | 8.689   |
| 321Pn-4  | 33.51                                                           | 0.06  | 31.71 | <dl  | 29.59  | 2.61                         | 0.03  | 0.18  | 97.69   | 8.212                 | 0.006 | 0.002 | 8.220   | 4.462 | -     | 3.963 | 0.348 | 0.007 | 8.780   |
| 321Pn-5  | 34.92                                                           | 0.09  | 41.69 | <dl  | 22.17  | 1.30                         | <dl   | 0.13  | 100.30  | 8.275                 | 0.009 | -     | 8.283   | 5.673 | -     | 2.871 | 0.167 | 0.005 | 8.717   |

Note: &lt;dl, below minimum limit of detection

**Table S7.** EPMA data for sphalerite and galena of the Zhibula Cu skarn.

|         | Sphalerite (ZnS) (wt.%) |       |      |      |      |       |      |      |      |      |      |      |       |      |      |        | Formula (to 2 atoms) |       |       |       |       |       |       |       |       |       |
|---------|-------------------------|-------|------|------|------|-------|------|------|------|------|------|------|-------|------|------|--------|----------------------|-------|-------|-------|-------|-------|-------|-------|-------|-------|
|         | S                       | Pb    | Cd   | Se   | Cu   | Fe    | Mn   | Ag   | In   | Te   | Bi   | Hg   | Zn    | Co   | Tl   | Total  | S                    | Se    | Pb    | Cd    | Fe    | Cu    | Ag    | Zn    | Co    | Bi    |
| 321Sp   | 33.84                   | 0.08  | 1.34 | <dl  | 0.11 | 12.59 | <dl  | <dl  | <dl  | <dl  | 0.12 | <dl  | 51.24 | 0.08 | 0.15 | 99.61  | 1.014                | -     | -     | 0.011 | 0.216 | 0.002 | -     | 0.753 | 0.001 | 0.001 |
| 374Sp   | 30.96                   | 0.11  | 2.02 | 0.13 | 3.23 | 1.96  | <dl  | <dl  | 0.07 | <dl  | 0.16 | 0.12 | 57.88 | 0.07 | 0.21 | 96.92  | 0.985                | 0.002 | 0.001 | 0.018 | 0.036 | 0.052 | -     | 0.903 | 0.001 | 0.001 |
| 355Sp-1 | 33.41                   | 0.07  | 0.23 | <dl  | 0.26 | 1.11  | 0.07 | <dl  | <dl  | <dl  | 0.15 | <dl  | 64.10 | 0.25 | 0.22 | 99.87  | 1.013                | -     | 0.000 | 0.002 | 0.019 | 0.004 | -     | 0.954 | 0.004 | 0.001 |
| 355Sp-2 | 33.45                   | 0.09  | 0.22 | <dl  | 0.20 | 1.03  | 0.08 | <dl  | 0.02 | <dl  | 0.13 | 0.09 | 64.55 | 0.28 | 0.28 | 100.44 | 1.011                | -     | 0.000 | 0.002 | 0.018 | 0.003 | -     | 0.957 | 0.005 | 0.001 |
| 355Sp-3 | 33.55                   | 0.08  | 0.23 | 0.06 | 0.20 | 1.05  | 0.07 | <dl  | <dl  | <dl  | 0.14 | <dl  | 64.83 | 0.28 | 0.23 | 100.72 | 1.010                | 0.001 | 0.000 | 0.002 | 0.018 | 0.003 | -     | 0.958 | 0.005 | 0.001 |
| 355Sp-4 | 32.91                   | 0.08  | 0.26 | <dl  | 1.10 | 1.86  | 0.09 | <dl  | 0.03 | <dl  | 0.14 | <dl  | 62.74 | 0.24 | 0.09 | 99.53  | 1.003                | -     | 0.000 | 0.002 | 0.033 | 0.017 | -     | 0.938 | 0.004 | 0.001 |
| 355Sp-5 | 33.09                   | 0.07  | 0.18 | <dl  | 0.35 | 1.15  | 0.09 | 0.06 | 0.03 | <dl  | 0.15 | 0.13 | 63.82 | 0.26 | 0.28 | 99.67  | 1.009                | -     | 0.000 | 0.002 | 0.020 | 0.005 | 0.001 | 0.954 | 0.004 | 0.001 |
|         | Galena (PbS) (wt.%)     |       |      |      |      |       |      |      |      |      |      |      |       |      |      |        | Formula (to 2 atoms) |       |       |       |       |       |       |       |       |       |
|         | S                       | Pb    | Cd   | Se   | Cu   | Fe    | Mn   | Ag   | In   | Te   | Bi   | Hg   | Zn    | Co   | Tl   | Total  | S                    | Se    | Pb    | Cd    | Fe    | Cu    | Ag    | Zn    | Co    | Bi    |
| 355Gn-1 | 11.21                   | 82.40 | 0.16 | 0.17 | 0.31 | -     | -    | 1.23 | -    | 0.05 | 2.50 | -    | -     | <dl  | -    | 98.03  | 0.897                | 0.005 | 1.021 | 0.004 | -     | 0.012 | 0.029 | -     | -     | 0.031 |
| 355Gn-2 | 11.02                   | 82.54 | <dl  | 0.23 | <dl  | -     | -    | 1.14 | -    | 0.05 | 2.43 | -    | -     | <dl  | -    | 97.41  | 0.895                | 0.008 | 1.038 | -     | -     | -     | 0.028 | -     | -     | 0.030 |
| 355Gn-3 | 11.08                   | 83.46 | <dl  | 0.20 | 0.44 | -     | -    | 1.04 | -    | 0.04 | 2.01 | -    | -     | <dl  | -    | 98.28  | 0.889                | 0.007 | 1.036 | -     | -     | 0.018 | 0.025 | -     | -     | 0.025 |

Note: <dl, below minimum limit of detection

**Table S8.** LA-ICP-MS data for bornite and chalcopyrite in the Zhibula Cu skarn (concentrations in ppm)

|         | V    | Cr   | Mn   | Co   | Ni   | Zn  | Ga   | Ga   | As   | Se  | Mo   | Ag  | Cd   | In   | Sn   | Sb   | Te  | Ba   | W    | Ir   | Au   | Hg   | Tl   | Pb <sup>204</sup> | Pb <sup>208</sup> | Bi    |
|---------|------|------|------|------|------|-----|------|------|------|-----|------|-----|------|------|------|------|-----|------|------|------|------|------|------|-------------------|-------------------|-------|
| 8Bn-1   | 0.08 | 1.4  | 4.9  | 0.14 | 0.30 | 5.6 | 0.44 | 0.39 | 0.79 | 210 | 0.56 | 674 | 0.23 | 2.0  | 1.1  | 0.25 | 137 | 83   | 0.43 | <dl  | 0.06 | 0.09 | 0.07 | 8.9               | 234               | 978   |
| 8Bn-2   | 1.4  | 2.0  | 1.3  | 0.08 | 0.19 | 4.4 | 6.0  | 0.08 | 0.62 | 204 | 0.28 | 338 | 0.47 | 1.4  | 1.2  | 1.1  | 63  | 25   | 3.7  | 0.02 | 0.02 | 0.08 | 0.12 |                   |                   | 885   |
| 8Bn-3   | 0.07 | 1.1  | 1.1  | 0.05 | 0.00 | 1.9 | 0.18 | <dl  | 0.56 | 209 | 0.21 | 381 | 0.20 | 1.8  | 1.4  | 0.08 | 55  | 45   | 0.29 | <dl  | 0.03 | 0.06 | 0.06 | 0.20              | 8.1               | 980   |
| 8Bn-4   | 0.10 | 3.4  | 2.3  | 0.04 | 0.12 | 9.2 | 0.99 | 0.05 | 0.71 | 204 | 0.72 | 381 | 0.27 | 1.8  | 1.3  | 0.13 | 99  | 237  | 0.98 | <dl  | 0.05 | 0.09 | 0.03 | 2.0               | 46                | 939   |
| 8Bn-5   | 0.04 | 0.78 | 1.2  | 0.03 | <dl  | 7.2 | 0.24 | 0.36 | 0.46 | 210 | 0.32 | 362 | 0.18 | 1.7  | 1.3  | 0.07 | 104 | 45   | 0.22 | 0.03 | 0.05 | 0.05 | 0.03 | 0.76              | 19                | 846   |
| 8Bn-6   | 0.07 | 1.0  | 1.5  | 0.02 | 0.09 | 2.7 | 0.20 | 0.04 | 0.59 | 208 | 0.75 | 412 | 0.31 | 1.9  | 2.0  | 0.10 | 136 | 63   | 0.20 | <dl  | 0.15 | 0.07 | 0.03 | 0.62              | 20                | 967   |
| 8Bn-7   | 0.03 | 1.0  | 2.5  | 0.03 | 0.17 | 1.9 | 0.29 | 0.10 | 0.53 | 189 | 0.36 | 444 | 0.29 | 2.3  | 1.1  | 0.10 | 41  | 47   | 0.39 | 0.04 | 0.03 | 0.07 | 0.13 | 1.5               | 20                | 965   |
| 8Bn-8   | 0.07 | 9.6  | 4.2  | 0.08 | 0.00 | 7.6 | 1.5  | 0.05 | 1.2  | 283 | 0.41 | 264 | 1.3  | 2.3  | 1.5  | 0.67 | 5.2 | 396  | 2.8  | <dl  | 0.05 | 0.09 | 0.01 | 2.4               | 29                | 981   |
| 8Bn-9   | 0.07 | 1.5  | 3.1  | 0.19 | 0.20 | 2.2 | 0.30 | <dl  | 0.68 | 143 | 0.58 | 283 | 0.23 | 1.8  | 1.5  | 0.29 | 3.0 | 99   | 0.92 | <dl  | 0.06 | 0.09 | 0.08 | 1.1               | 22                | 959   |
| 8Bn-10  | 0.07 | 35   | 8.9  | 0.21 | 0.49 | 8.6 | 1.5  | 0.17 | 1.4  | 243 | 0.59 | 506 | 0.57 | 1.9  | 1.8  | 0.80 | 23  | 450  | 0.43 | <dl  | 0.05 | 0.16 | 0.09 | 5.0               | 89                | 1117  |
| 8Bn-11  | 0.46 | 16   | 7.7  | 0.09 | <dl  | 3.0 | 0.22 | 0.15 | 1.1  | 232 | 0.53 | 565 | <dl  | 2.0  | 2.0  | 0.20 | 31  | 77   | 0.72 | <dl  | 0.05 | 0.19 | 0.17 |                   |                   | 1020  |
| 8Bn-12  | 1.9  | 16   | 4.1  | 0.07 | 0.46 | 3.7 | 0.43 | <dl  | 2.3  | 201 | 0.46 | 502 | 0.44 | 1.8  | 2.6  | 2.3  | 9.4 | 143  | 1.2  | <dl  | 0.04 | 0.11 | 0.04 | 25                | 438               | 940   |
| 8Bn-13  | 0.06 | 61   | 7.0  | 0.15 | 0.17 | 17  | 1.6  | <dl  | 0.80 | 196 | 0.72 | 458 | 0.45 | 1.6  | 1.9  | 0.68 | 28  | 463  | 1.7  | <dl  | <dl  | 0.09 | 0.01 | 10                | 182               | 979   |
| 8Bn-14  | 0.07 | 2.7  | 2.8  | 0.07 | <dl  | 2.4 | 0.26 | 0.10 | 0.74 | 224 | 0.67 | 467 | 0.29 | 2.9  | 1.7  | 0.16 | 23  | 211  | 0.89 | <dl  | <dl  | 0.10 | 0.03 | 45                | 761               | 1323  |
| 8Bn-15  | 0.08 | 16   | 1.2  | 0.12 | 0.19 | 4.3 | 0.32 | <dl  | 0.66 | 179 | 1.0  | 343 | 0.23 | 2.1  | 1.2  | 0.11 | 15  | 94   | 0.37 | <dl  | 0.02 | 0.14 | 0.02 | 0.37              | 7.6               | 1266  |
| 8Bn-16  | 0.13 | 11   | 0.90 | 0.05 | <dl  | 11  | 0.23 | 0.13 | 0.76 | 214 | 0.15 | 320 | 0.28 | 2.2  | 1.7  | 0.23 | 38  | 99   | 0.31 | <dl  | 0.11 | 0.11 | 0.02 | 0.60              | 11                | 1291  |
| 8Bn-17  | 0.33 | 2.6  |      | 0.15 | 0.29 | 4.8 | 0.38 | 0.10 | 0.61 | 232 | 0.78 | 441 | 0.11 | 3.3  | 2.2  | 0.48 | 112 | 119  | 0.36 | <dl  | 1.61 | 0.09 | 0.03 | 1.4               | 10                | 1135  |
| 8Bn-18  | 0.05 | 1.0  | 1.9  | 0.07 | 0.35 | 2.0 | 0.30 | 0.10 | 0.60 | 214 | 0.46 | 901 | 0.10 | 2.0  | 1.8  | 0.11 | 283 | 80   | 0.27 | <dl  | 0.05 | 0.09 | 0.08 | 1.9               | 19                | 978   |
| 8Bn-19  | 0.06 | 1.1  | 4.5  | 0.11 | 0.15 | 6.0 | 2.1  | 0.22 | 0.51 | 198 | 0.64 | 503 | 0.50 | 1.9  | 1.2  | 0.09 | 125 | 751  | 0.29 | <dl  | 0.05 | 0.08 | 0.04 | 1.4               | 21                | 942   |
| 8Bn-20  | 0.05 | 4.5  | 2.4  | 0.06 | <dl  | 2.9 | 0.42 | 0.06 | 0.62 | 214 | 0.58 | 356 | 0.12 | 1.7  | 1.7  | 0.12 | 55  | 255  | 0.45 | 0.02 | 0.05 | 0.09 | 0.03 | 1.3               | 17                | 924   |
| Mean    | 0.26 | 9.4  | 3.3  | 0.09 | 0.16 | 5.4 | 0.89 | 0.10 | 0.82 | 210 | 0.54 | 445 | 0.33 | 2.0  | 1.6  | 0.40 | 69  | 189  | 0.84 | 0.01 | 0.13 | 0.10 | 0.06 | 6.1               | 109               | 1021  |
| SD      | 0.50 | 15   | 2.4  | 0.05 | 0.16 | 3.9 | 1.3  | 0.11 | 0.43 | 27  | 0.21 | 146 | 0.28 | 0.44 | 0.42 | 0.53 | 67  | 189  | 0.90 | 0.01 | 0.35 | 0.03 | 0.04 | 11                | 197               | 134   |
| Max.    | 1.9  | 61   | 8.9  | 0.21 | 0.49 | 17  | 6.0  | 0.39 | 2.3  | 283 | 1.0  | 901 | 1.3  | 3.3  | 2.6  | 2.3  | 283 | 751  | 3.7  | 0.04 | 1.6  | 0.19 | 0.17 | 45                | 761               | 1323  |
| Min.    | 0.03 | 0.78 | 0.90 | 0.02 | <dl  | 1.9 | 0.18 | <dl  | 0.46 | 143 | 0.15 | 264 | <dl  | 1.4  | 1.1  | 0.07 | 3.0 | 25   | 0.20 | <dl  | <dl  | 0.05 | 0.01 | 0.20              | 7.6               | 846   |
| 374Bn-1 | 0.04 | 3.3  | 0.32 | 0.26 | 0.24 | 2.3 | 0.07 | 0.02 | 1.8  | 510 | 0.47 | 445 | 0.26 | 0.44 | 0.17 | 0.11 | 15  | <dl  | <dl  | <dl  | 0.04 | 0.04 | <dl  | 1.0               | 21                | 13793 |
| 374Bn-2 | 4.5  | 2.8  |      | 0.06 | 0.24 | 2.3 | 0.63 | 0.59 | 11   | 477 | 0.64 | 427 | 0.92 | 0.19 | 0.74 | 1.7  | 21  | 1.2  | 0.08 | <dl  | 0.03 | 0.04 | 0.02 | 3.0               | 45                | 17348 |
| 374Bn-3 | 0.06 | 4.0  | 0.42 | 0.26 | 0.29 | 1.9 | 0.05 | 0.02 | 0.70 | 543 | 0.38 | 506 | 0.23 | 0.04 | 0.23 | 0.16 | 21  | <dl  | 0.12 | <dl  | 0.01 | 0.06 | 0.03 | 0.47              | 16                | 17156 |
| 374Bn-4 | 0.13 | 4.0  | 7.3  | 0.30 | 0.24 | 13  | 0.07 | 0.15 | 0.85 | 502 | 0.54 | 461 | 1.4  | 0.03 | 1.0  | 0.16 | 23  | <dl  | 0.15 | 0.01 | 0.04 | 0.06 | 0.01 | 14                | 257               | 17885 |
| 374Bn-5 | 4.5  | 7.8  |      | 0.50 | 0.41 | 4.5 | 1.3  | 1.6  | 15   | 542 | 0.65 | 477 | 0.53 | 0.25 | 6.7  | 0.63 | 55  | 1.5  | 3.0  | <dl  | <dl  | 0.09 | 0.02 | 15                | 238               | 23903 |
| 374Bn-6 | 1.4  | 7.3  |      | 0.45 | 0.24 | 1.6 | 0.14 | 0.26 | 8.2  | 472 | 0.32 | 510 | 0.17 | 0.14 | 0.47 | 0.87 | 44  | 0.79 | 0.13 | 0.01 | 0.04 | 0.06 | 0.02 | 43                | 753               | 25384 |
| 374Bn-7 | 0.04 | 4.3  | 0.43 | 0.32 | 0.20 | 1.5 | 0.04 | 0.10 | 0.70 | 470 | 0.51 | 622 | 0.27 | 0.16 | 0.20 | 0.22 | 102 | <dl  | 0.07 | <dl  | 0.05 | 0.05 | 0.03 | 21                | 399               | 24715 |
| 374Bn-8 | 0.05 | 4.2  | 0.43 | 0.43 | 0.18 | 2.1 | 0.02 | <dl  | 0.71 | 515 | 0.38 | 563 | 0.55 | 0.15 | 0.19 | 0.15 | 100 | 0.29 | 0.17 | <dl  | <dl  | 0.06 | <dl  | 10                | 160               | 27467 |
| 374Bn-9 | 0.05 | 6.2  | 0.43 | 0.29 | 0.35 | 1.9 | 0.23 | 0.05 | 0.71 | 511 | 0.58 | 497 | 0.29 | 0.15 | 0.21 | 0.16 | 61  | 0.75 | <dl  | <dl  | 0.04 | 0.05 | <dl  | 9.5               | 167               | 25123 |
| Mean    | 1.2  | 4.9  | 1.6  | 0.32 | 0.27 | 3.4 | 0.28 | 0.31 | 4.5  | 505 | 0.50 | 501 | 0.52 | 0.17 | 1.1  | 0.47 | 49  | 0.51 | 0.41 | 0.00 | 0.03 | 0.06 | 0.01 | 13                | 228               | 21419 |

|          |      |      |      |      |      |     |      |      |      |     |      |      |      |      |      |      |      |      |      |      |      |      |      |      |      |       |
|----------|------|------|------|------|------|-----|------|------|------|-----|------|------|------|------|------|------|------|------|------|------|------|------|------|------|------|-------|
| SD       | 1.9  | 1.8  | 2.8  | 0.13 | 0.07 | 3.7 | 0.42 | 0.52 | 5.6  | 28  | 0.12 | 61   | 0.41 | 0.12 | 2.1  | 0.54 | 33   | 0.59 | 0.96 | 0.01 | 0.02 | 0.01 | 0.01 | 13   | 233  | 4853  |
| Max.     | 4.5  | 7.8  | 7.3  | 0.50 | 0.41 | 13  | 1.3  | 1.6  | 15   | 543 | 0.65 | 622  | 1.4  | 0.44 | 6.7  | 1.7  | 102  | 1.5  | 3.0  | 0.01 | 0.05 | 0.09 | 0.03 | 43   | 753  | 27467 |
| Min.     | 0.04 | 2.8  | 0.32 | 0.06 | 0.18 | 1.5 | 0.02 | <dl  | 0.70 | 470 | 0.32 | 427  | 0.17 | 0.03 | 0.17 | 0.11 | 15   | <dl  | <dl  | <dl  | <dl  | 0.04 | <dl  | 0.47 | 16   | 13793 |
| 374Cp-1  | 0.09 | 7.4  | 0.68 | 4.3  | 0.19 | 4.9 | 0.12 | 0.10 | 1.1  | 197 | 0.09 | 0.74 | 0.30 | 6.2  | 0.36 | 0.26 | 3.7  | <dl  | <dl  | <dl  | 0.06 | 0.12 | <dl  | 0.39 | 1.5  | 1.4   |
| 374Cp-2  | 0.04 | 6.5  | 0.61 | 5.5  | 0.41 | 3.3 | 0.07 | 0.18 | 1.2  | 185 | 0.08 | 1.4  | 0.35 | 5.8  | 0.34 | 0.24 | 1.8  | 1.1  | <dl  | 0.01 | 0.05 | 0.09 | 0.03 | 0.29 | 0.20 | 0.33  |
| 374Cp-3  | 0.06 | 7.4  | 0.80 | 6.1  | 0.27 | 12  | 0.14 | 0.04 | 1.0  | 234 | 0.10 | 2.1  | 1.2  | 5.7  | 0.37 | 0.29 | 5.0  | <dl  | 0.04 | <dl  | 0.00 | 0.11 | 0.02 | 0.30 | 0.26 | 0.11  |
| 374Cp-4  | 0.06 | 6.6  | 0.60 | 4.6  | 0.33 | 4.5 | 0.02 | 0.09 | 0.92 | 174 | 0.16 | 2.5  | 0.26 | 5.7  | 0.27 | 0.22 | 3.3  | <dl  | <dl  | 0.01 | 0.14 | 0.09 | 0.04 | 0.28 | 2.3  | 13    |
| 374Cp-5  | 0.12 | 6.7  | 0.62 | 3.4  | 0.36 | 6.7 | 0.03 | 0.13 | 0.97 | 161 | 0.12 | 7.3  | 0.46 | 6.0  | 0.38 | 0.25 | 2.3  | 1.2  | <dl  | <dl  | 0.04 | 0.08 | 0.05 | 0.90 | 10   |       |
| 374Cp-6  | 1.6  | 7.1  |      | 2.4  | 0.46 | 3.6 | 0.20 | 0.17 | 2.1  | 169 | <dl  | 1.7  | 0.28 | 6.1  | 0.85 | 0.20 | 3.4  | <dl  | 0.09 | 0.03 | <dl  | 0.10 | 0.02 | 1.5  | 16   | 2.3   |
| 374Cp-7  | 0.12 | 7.1  | 0.67 | 1.6  | <dl  | 3.1 | <dl  | 0.10 | 1.1  | 165 | 0.43 | 6.2  | 0.41 | 6.3  | 0.32 | 0.25 | 4.1  | <dl  | <dl  | 0.05 | 0.06 | 0.11 | 0.03 | 0.74 | 5.3  |       |
| 374Cp-8  | 0.23 | 8.3  |      | 2.3  | 0.33 | 3.7 | 0.12 | 0.13 | 0.96 | 159 | 0.11 | 7.7  | 1.6  | 5.8  | 0.32 | 0.21 | 3.2  | 1.1  | 0.10 | <dl  | 0.14 | 0.10 | 0.02 | 0.40 | 7.3  | 75    |
| Mean     | 0.29 | 7.1  | 0.66 | 3.8  | 0.29 | 5.2 | 0.09 | 0.12 | 1.2  | 180 | 0.14 | 3.7  | 0.61 | 6.0  | 0.40 | 0.24 | 3.4  | 0.43 | 0.03 | 0.01 | 0.06 | 0.10 | 0.03 | 0.60 | 5.3  | 15    |
| SD       | 0.54 | 0.58 | 0.07 | 1.6  | 0.14 | 2.9 | 0.07 | 0.04 | 0.39 | 25  | 0.13 | 2.8  | 0.51 | 0.23 | 0.18 | 0.03 | 1.0  | 0.59 | 0.04 | 0.02 | 0.05 | 0.01 | 0.01 | 0.43 | 5.5  | 30    |
| Max.     | 1.6  | 8.3  | 0.80 | 6.1  | 0.46 | 12  | 0.20 | 0.18 | 2.1  | 234 | 0.43 | 7.7  | 1.6  | 6.3  | 0.85 | 0.29 | 5.0  | 1.2  | 0.10 | 0.05 | 0.14 | 0.12 | 0.05 | 1.5  | 16   | 75    |
| Min.     | 0.04 | 6.5  | 0.60 | 1.6  | <dl  | 3.1 | <dl  | 0.04 | 0.92 | 159 | <dl  | 0.74 | 0.26 | 5.7  | 0.27 | 0.20 | 1.8  | <dl  | <dl  | <dl  | <dl  | 0.08 | <dl  | 0.28 | <dl  | <dl   |
| 372Cp-1  | 0.07 | 6.4  | 22.0 | 1.9  | 0.31 | 7.5 | 0.11 | 0.03 | 0.81 | 128 | <dl  | 0.87 | <dl  | 6.0  | 0.26 | 0.19 | 2.0  | <dl  | 0.90 | <dl  | 0.05 | 0.08 | 0.02 | 0.93 | 5.4  | 4.2   |
| 372Cp-2  | 0.10 | 6.1  | 22.7 | 1.7  | 0.28 | 3.2 | 0.08 | 0.07 | 0.94 | 126 | 0.10 | 0.23 | 0.24 | 6.1  | 0.28 | 0.22 | 1.0  | <dl  | <dl  | 0.03 | 0.07 | 0.08 | 0.07 | 0.28 | 5.4  | 2.9   |
| 372Cp-3  | 0.17 | 6.4  |      | 3.7  | 1.2  | 22  | 0.09 | 0.09 | 1.2  | 136 | 0.12 | 0.69 | 0.27 | 5.0  | 0.28 | 0.34 | 1.2  | 2.0  | 1.3  | <dl  | 0.04 | 0.10 | 0.03 | 0.43 | 2.5  | 3.0   |
| 372Cp-4  | 0.08 | 5.7  | 35.0 | 0.60 | 0.43 | 19  | 0.15 | 0.03 | 0.85 | 121 | 0.11 | 2.4  | 0.18 | 5.5  | 0.27 | 0.21 | 0.67 | 0.96 | 6.5  | <dl  | 0.08 | 0.14 | 0.05 | 1.4  | 18   | 6.3   |
| 372Cp-5  | 0.52 | 5.9  |      | 1.2  | 0.37 | 16  | 0.21 | 0.42 | 0.91 | 126 | 1.4  | 2.2  | 0.09 | 5.2  | 0.32 | 0.29 | 1.6  | 2.0  |      | <dl  | 0.05 | 0.07 | 0.09 | 1.8  | 20   | 10    |
| 372Cp-6  | 1.7  | 5.1  |      | 2.7  | 0.82 | 27  | 0.21 | 0.03 | 2.0  | 119 | 0.47 | 1.9  | 0.22 | 4.7  | 0.77 | 0.92 | 0.31 | 1.0  | 41   | <dl  | 0.08 | 0.08 | 0.04 | 1.8  | 21   | 11    |
| 372Cp-7  | 0.81 | 5.0  |      | 6.4  | 1.2  | 63  | 0.69 | 1.4  | 0.86 | 112 | 0.17 | 1.2  | 0.31 | 5.2  | 0.27 | 0.17 | 0.73 | 2.9  | 0.03 | <dl  | 0.07 | 0.09 | 0.03 | 0.28 | 2.4  | 2.0   |
| 372Cp-8  | 1.3  | 8.7  |      | 1.8  | 0.46 | 23  | 0.08 | <dl  | 0.83 | 123 |      | 2.9  | 0.20 | 5.3  | 0.48 | 0.47 | 1.3  | 3.4  |      | 0.01 | 0.12 | 0.08 | 0.01 | 2.1  | 17   | 8.7   |
| 372Cp-9  | 0.09 | 6.6  | 61   | 0.93 | 0.27 | 2.1 | 0.05 | 0.03 | 0.71 | 128 | 0.11 | 3.5  | 0.21 | 5.1  | 0.22 | 0.20 | 0.84 | <dl  | <dl  | <dl  | 0.18 | 0.09 | 0.06 | 0.41 | 3.2  | 3.4   |
| 372Cp-10 | 0.65 | 5.3  | 38   | 2.0  | 0.26 | 2.4 | 0.19 | 0.10 | 0.77 | 124 | 0.17 | 0.44 | 0.33 | 5.9  | 0.59 | 0.21 | 0.67 | <dl  | 7.0  | 0.01 | 0.05 | 0.08 | 0.06 | 0.38 | 2.8  | 1.9   |
| 372Cp-11 | 0.07 | 5.0  | 6.1  | 1.5  | 0.21 | 5.0 | 0.05 | 0.06 | 0.76 | 103 | 0.11 | 0.17 | 0.23 | 5.3  | 0.34 | 0.16 | 1.3  | <dl  | 0.20 | <dl  | 0.09 | 0.08 | 0.04 | 0.22 | 1.3  | 0.81  |
| 372Cp-12 | 0.49 | 5.5  | 17   | 2.1  | 0.23 | 3.3 | 0.09 | 0.09 | 0.98 | 132 | 0.21 | 0.37 | 0.36 | 5.8  | 0.27 | 0.21 | 1.8  | 2.5  | 0.04 | <dl  | 0.07 | 0.10 | 0.07 | 0.40 | 1.1  | 0.88  |
| Mean     | 0.50 | 6.0  | 29   | 2.2  | 0.50 | 16  | 0.17 | 0.20 | 0.97 | 123 | 0.27 | 1.4  | 0.22 | 5.4  | 0.36 | 0.30 | 1.1  | 1.2  | 5.7  | 0.00 | 0.08 | 0.09 | 0.05 | 0.88 | 8.4  | 4.5   |
| SD       | 0.53 | 1.0  | 18   | 1.5  | 0.36 | 17  | 0.17 | 0.41 | 0.36 | 9.0 | 0.39 | 1.1  | 0.10 | 0.43 | 0.17 | 0.21 | 0.51 | 1.3  | 13   | 0.01 | 0.04 | 0.02 | 0.02 | 0.72 | 8.1  | 3.5   |
| Max.     | 1.7  | 8.7  | 61   | 6.4  | 1.2  | 63  | 0.69 | 1.4  | 2.0  | 136 | 1.4  | 3.5  | 0.36 | 6.1  | 0.77 | 0.92 | 2.0  | 3.4  | 41   | 0.03 | 0.18 | 0.14 | 0.09 | 2.1  | 21   | 11    |
| Min.     | 0.07 | 5.0  | 6.1  | 0.60 | 0.21 | 2.1 | 0.05 | <dl  | 0.71 | 103 | <dl  | 0.17 | <dl  | 4.7  | 0.22 | 0.16 | 0.31 | <dl  | <dl  | <dl  | 0.04 | 0.07 | 0.01 | 0.22 | 1.1  | 0.81  |
| 176Cp-1  | 0.18 | 2.2  | 15   | 2.3  | 0.15 | 3.0 | 0.04 | 0.15 | 1.3  | 130 | 0.31 | 1.8  | 0.62 | 1.7  | 0.48 | 0.16 | 1.1  | 5.0  | 0.17 | 0.07 | 0.08 | 0.21 | 0.03 | 0.55 | 0.46 | 1.8   |
| 176Cp-2  | 1.3  | 2.8  |      | 8.4  | 4.4  | 44  | 0.31 | 0.24 | 1.4  | 126 | <dl  | 4.0  | 0.71 | 1.8  | 0.57 | 0.35 | 0.88 | <dl  | 0.15 | <dl  | <dl  | 0.26 | 0.07 | 0.78 | 2.5  | 12    |
| 176Cp-3  | 0.12 | 2.0  | 7.9  | 2.0  | <dl  | 2.4 | 0.08 | 0.14 | 1.3  | 99  | <dl  | 0.72 | 0.16 | 2.0  | 0.56 | 0.22 | 0.84 | <dl  | <dl  | <dl  | <dl  | 0.21 | 0.01 | 0.59 | 1.5  | 1.0   |
| 176Cp-4  | 0.92 | 2.3  | 72   | 2.6  | 1.1  | 9.4 | 0.04 | 0.11 | 1.3  | 99  | 0.07 | 5.8  | 0.00 | 2.0  | 0.55 | 0.19 | 1.5  | <dl  | <dl  | <dl  | 0.12 | 0.26 | 0.06 | 1.0  | 18   | 10    |
| 176Cp-5  | 0.14 | 3.8  | 1.9  | 1.9  | <dl  | 3.5 | 0.11 | 0.16 | 1.3  | 138 | <dl  | 14   | 0.37 | 1.7  | 0.45 | 0.20 |      | <dl  | <dl  | <dl  | 0.12 | 0.26 | 0.04 | 2.1  | 5.9  | 36    |
| 176Cp-6  | 0.11 | 2.1  | 0.93 | 1.6  | 0.67 | 5.1 | 0.08 | 0.15 | 1.2  | 90  | 0.20 | 1.5  | 0.64 | 1.8  | 0.59 | 0.23 | 1.5  | <dl  | <dl  | <dl  | <dl  | 0.28 | 0.05 | 0.83 | 0.44 | 3.1   |

|      |      |      |      |     |     |     |      |      |      |     |      |      |      |      |      |      |      |      |      |      |      |      |      |      |     |     |
|------|------|------|------|-----|-----|-----|------|------|------|-----|------|------|------|------|------|------|------|------|------|------|------|------|------|------|-----|-----|
| Mean | 0.47 | 2.5  | 20   | 3.1 | 1.1 | 11  | 0.11 | 0.16 | 1.3  | 114 | 0.10 | 4.6  | 0.42 | 1.8  | 0.53 | 0.23 | 1.1  | 0.84 | 0.05 | 0.01 | 0.05 | 0.25 | 0.04 | 1.0  | 4.8 | 11  |
| SD   | 0.53 | 0.68 | 30   | 2.6 | 1.7 | 16  | 0.10 | 0.04 | 0.06 | 20  | 0.13 | 4.8  | 0.29 | 0.14 | 0.06 | 0.07 | 0.31 | 2.1  | 0.08 | 0.03 | 0.06 | 0.03 | 0.02 | 0.57 | 6.7 | 13  |
| Max. | 1.3  | 3.8  | 72   | 8.4 | 4.4 | 44  | 0.31 | 0.24 | 1.4  | 138 | 0.31 | 14   | 0.71 | 2.0  | 0.59 | 0.35 | 1.5  | 5.0  | 0.17 | 0.07 | 0.12 | 0.28 | 0.07 | 2.1  | 18  | 36  |
| Min. | 0.11 | 2.0  | 0.93 | 1.6 | <dl | 2.4 | 0.04 | 0.11 | 1.2  | 90  | <dl  | 0.72 | <dl  | 1.7  | 0.45 | 0.16 | 0.84 | <dl  | <dl  | <dl  | <dl  | 0.21 | 0.01 | 0.55 | <dl | 1.0 |

Note: <dl, below minimum limit of detection
